# Supplementary material for: 5′-hydroxy Auraptene stimulates osteoblast differentiation of bone marrow-derived mesenchymal stem cells via a BMP-dependent mechanism
Source: PubMed Central journal article supplement (PMC6610929; doi:10.1186/s12929-019-0544-7), 2019-07-05
Supplement: 12929_2019_544_MOESM1_ESM.pdf [file 12929_2019_544_MOESM1_ESM.pdf]

## Additional file 1: Figure S1

(A)

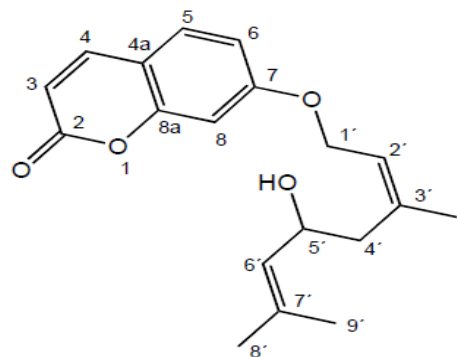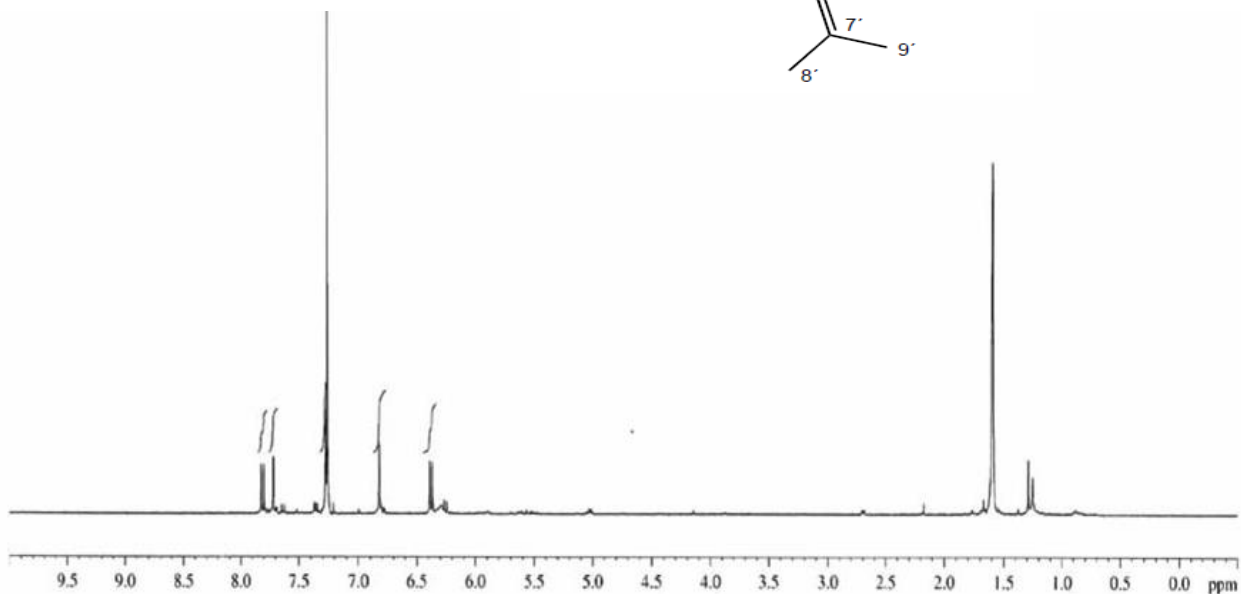

(B)

| Position | $\gamma$ H (J in Hz) | $\gamma$ c |
|----------|----------------------|------------|
| -        | -                    | -          |
| 2        | -                    | 130.4      |
| 3        | 5.36 (d, 9.6)        | 124.7      |
| 4        | 4.76 (d, 9.6)        | 154.3      |
| 4a       | -                    | 136.5      |
| 5        | 8.36 (s)             | 123.4      |
| 6        | -                    | 145.8      |
| 7        | -                    | 138.6      |
| 8        | -                    | 121.5      |
| 8a       | -                    | 153.8      |
| 2'       | 6.68 (d, 2.0)        | 166.7      |
| 3'       | 7.81 (d, 2.0)        | 116.8      |
| 1''      | 3.04 (d, 7.2)        | 75.8       |
| 2''      | 3.68 (dt, 7.2, 1.2)  | 152.9      |
| 3''      | -                    | 149.6      |
| 4''      | 1.17 (m)             | 52.8       |
| 5''      | 5.41 (m)             | 88.2       |
| 6''      | 2.11 (m)             | 157.2      |
| 7''      | -                    | 125.1      |
| 8''      | 3.68 (s)             | 11.9       |
| 9''      | 3.76 (s)             | 35.7       |
| 10''     | 3.65 (s)             | 16.2       |

**Figure S1: NMR spectrum of 5'-hydroxy-auraptene**

(A)  $^1\text{H}$  NMR spectrum of 5'-hydroxy-auraptene (400 MHz,  $\text{CDCl}_3$ ).

(B)  $^1\text{H}$  and  $^{13}\text{C}$  NMR spectral data of 5'-hydroxy-auraptene in  $\text{CDCl}_3$
