# Supplementary material for: 5′-hydroxy Auraptene stimulates osteoblast differentiation of bone marrow-derived mesenchymal stem cells via a BMP-dependent mechanism
Source: PubMed Central journal article supplement (PMC6610929; doi:10.1186/s12929-019-0544-7), 2019-07-05
Supplement: 12929_2019_544_MOESM2_ESM.pdf [file 12929_2019_544_MOESM2_ESM.pdf]

## Additional file 2: Figure S2

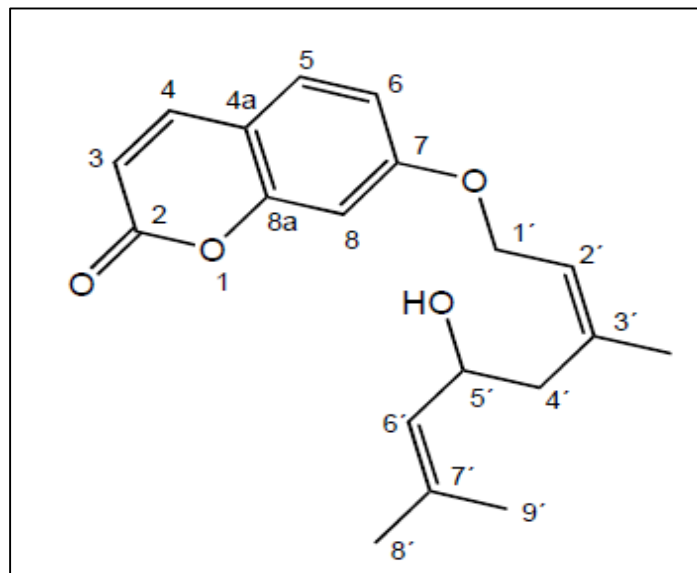

**Figure S2: Chemical Structure of 5'-Hydroxy Auraptene**

Chemical structure of isolated and purified 7-(5-Hydroxy-3,7-dimethylocta-2,6-dienyloxy)-chromen-2-one
