# Supplementary material for: 5′-hydroxy Auraptene stimulates osteoblast differentiation of bone marrow-derived mesenchymal stem cells via a BMP-dependent mechanism
Source: PubMed Central journal article supplement (PMC6610929; doi:10.1186/s12929-019-0544-7), 2019-07-05
Supplement: 12929_2019_544_MOESM4_ESM.pdf [file 12929_2019_544_MOESM4_ESM.pdf]

**Supplementary Table 1:** List of primers used for qPCR

| <b>Gene name</b>                        | <b>Forward primer 5'-3'</b>   | <b>Reverse Primer 5'-3'</b>          |
|-----------------------------------------|-------------------------------|--------------------------------------|
| <i><b><math>\beta</math>-Actin</b></i>  | GAT ATC GCT GCG CTG GTC GTC   | ACG CAG CTC ATT GTA GAA GGT GTG<br>G |
| <i><b>Hprt</b></i>                      | TCAGTCAACGGGGGACATAAA         | GGGGCTGTACTGCTTAACCAG                |
| <i><b>PPAR-<math>\gamma</math></b></i>  | GGG TCA GCT CTT GTG AAT GG    | CTG ATG CAC TGC CTA TGA GC           |
| <i><b>C/ebp-<math>\alpha</math></b></i> | AAG CCA AGA AGT CGG TGG A     | CAG TCC ACG GCT CAG CTG TTC          |
| <i><b>aP2</b></i>                       | CAA AAT GTG TGA TGC CTT TGT G | CTC TTC CTT TGG CTC ATG CC           |
| <i><b>Lpl</b></i>                       | CTGCTGGCGTAGCAGGAAGT          | GCTGGAAAGTGCCTCCATTG                 |
| <i><b>Apm1</b></i>                      | GAC GTT ACT ACA ACT GAA GAG C | CAT TCT TTT CCT GAT ACT GGT C        |
| <i><b>Runx2</b></i>                     | AGC AAC AGC AAC AAC AGC AG    | GTA ATC TGA CTC TGT CCT TG           |
| <i><b>Ocn</b></i>                       | CAG ACA AGT CCC ACA CAG CA    | CTT TAT TTT GGA GCT GCT GT           |
| <i><b>Alp</b></i>                       | GCC CTC TCC AAG ACA TAT A     | CCA TGA TCA CGT CGA TAT CC           |
| <i><b>Opn</b></i>                       | GAA ACT CTT CCA AGC AAT TC    | GGA CTA GCT TGT CCT TGT GG           |
| <i><b>Msx2</b></i>                      | CCATATACGGCGCATCCTACC         | CAACCGGCGTGGCATAGAG                  |
| <i><b>Dlx5</b></i>                      | CTGGCCGCTTTACAGAGAAG          | CTGGTGACTGTGGCGAGTTA                 |
| <i><b>Smad4</b></i>                     | TTTGCTTGGGTCAACTCT            | ACTGCACTCCTTTGCCTA                   |
